# Supplementary material
Source: PubMed Central journal article supplement (PMC3969821)
Supplement: NIHMS557223-supplement-Supplemental_table_S1.pdf [file NIHMS557223-supplement-Supplemental_table_S1.pdf]

**Supplementary Information S1 (table)** | Occurrence of high-affinity oxidase genes in bacterial genomes.

| <b>Phylum</b>       | <b>Genomes Analyzed</b> | <b>Genomes with high-affinity oxidase genes</b> |
|---------------------|-------------------------|-------------------------------------------------|
| Acidobacteria       | 6                       | 3                                               |
| Actinobacteria      | 118                     | 94                                              |
| Aquificae           | 9                       | 8                                               |
| Bacteroidetes       | 54                      | 51                                              |
| Chlamydiae          | 12                      | 10                                              |
| Chlorobi            | 10                      | 10                                              |
| Chloroflexi         | 15                      | 9                                               |
| Cyanobacteria       | 28                      | 20                                              |
| Deferribacteres     | 4                       | 4                                               |
| Deinococcus-Thermus | 12                      | 11                                              |
| Dictyglomi          | 2                       | 0                                               |
| Elusibacteria       | 2                       | 0                                               |
| Fibrobacteres       | 1                       | 0                                               |
| Firmicutes          | 218                     | 66                                              |
| Fusobacteria        | 5                       | 0                                               |
| Nitrospirae         | 2                       | 2                                               |
| Planctomycetes      | 5                       | 5                                               |
| Proteobacteria      | 446                     | 338                                             |
| Spirochetaes        | 2                       | 26                                              |
| Synergistetes       | 3                       | 0                                               |
| Thermotogae         | 12                      | 0                                               |
| Verrumicrobia       | 4                       | 4                                               |
