# Supplementary material
Source: PubMed Central journal article supplement (PMC3969821)
Supplement: NIHMS557223-supplement-Supplemental_table_S3.pdf [file NIHMS557223-supplement-Supplemental_table_S3.pdf]

**Supplementary Information S3 (table)** | MG-RAST accession numbers for the metagenomes in Figures 2 and 3.

| <b>Shotgun Metagenome</b>                | <b>MG-RAST id</b> |
|------------------------------------------|-------------------|
| <b>Gulf of Maine</b>                     | 4441579.3         |
| <b>Indian Ocean</b>                      | 4441155.3         |
| <b>Fjord-Norway</b>                      | 4440275.3         |
| <b>Michigan Agricultural Soil</b>        | Schmidt lab       |
| <b>Puerto Rican Rain Forest</b>          | 4446153.3         |
| <b>Michigan Deciduous Forest Soil</b>    | Schmidt Lab       |
| <b>Acid Mine Drainage</b>                | 4441138.3         |
| <b>Medium Salinity Saltern</b>           | 4440435.3         |
| <b>Low Salinity Saltern</b>              | 4440437.3         |
| <b>Salton Sea Sediment</b>               | 4440329.3         |
| <b>Chicken cecum</b>                     | 4440285.3         |
| <b>Squirrel feces</b>                    | 4461378.3         |
| <b>Chimpanzee feces</b>                  | 4461353.3         |
| <b>Human feces (n=7)</b>                 | 4440452.7         |
|                                          | 4440616.3         |
|                                          | 4440826.3         |
|                                          | 4440639.3         |
|                                          | 4440824.3         |
|                                          | 4440595.4         |
|                                          | 4440614.3         |
| <b>Human mouth</b>                       | 4447943.3         |
| <b>Cow rumen</b>                         | 4441681.3         |
| <b>Michigan Early Successional Soil</b>  | Schmidt Lab       |
| <b>Michigan Successional Forest Soil</b> | Schmidt Lab       |
